# Supplementary material
Source: PubMed Central journal article supplement (PMC4524239)
Supplement: JVI.00671-15_zjv999090406so1.pdf [file JVI.00671-15_zjv999090406so1.pdf]

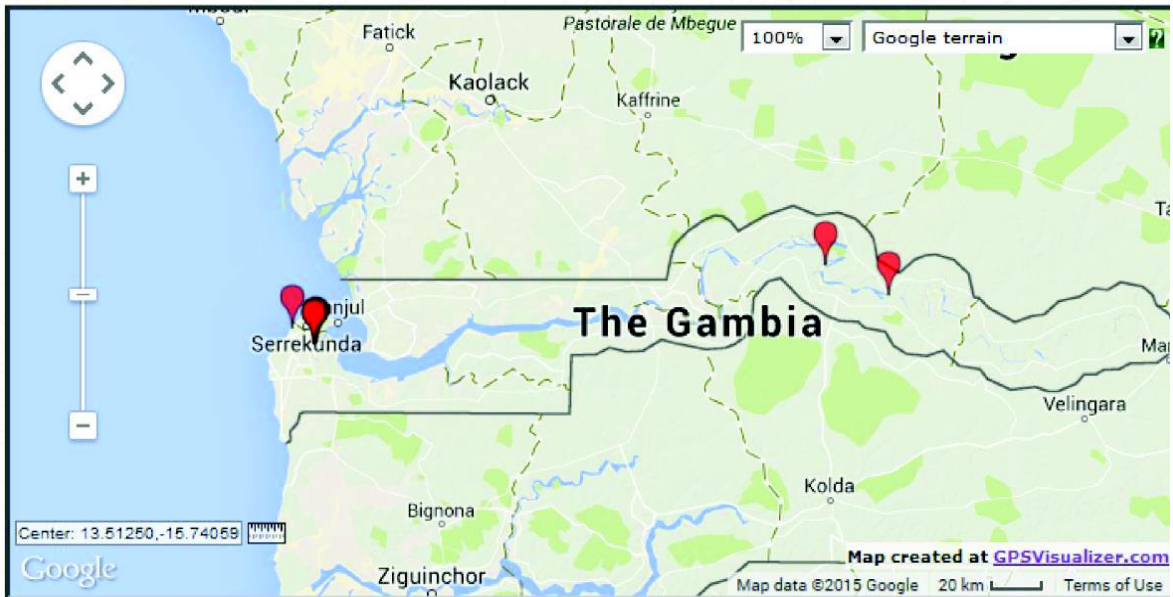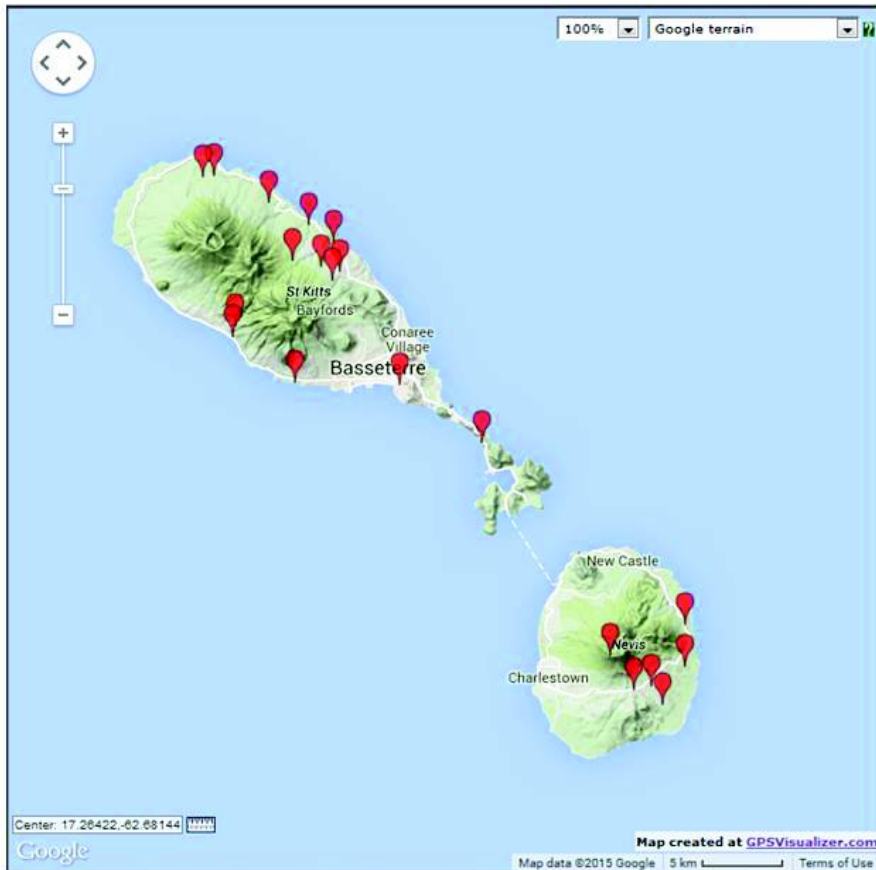

**Figure S1.** Satellite map of Gambia and the Caribbean (St. Kitts, Nevis) depicting the collection sites for samples used in this study.

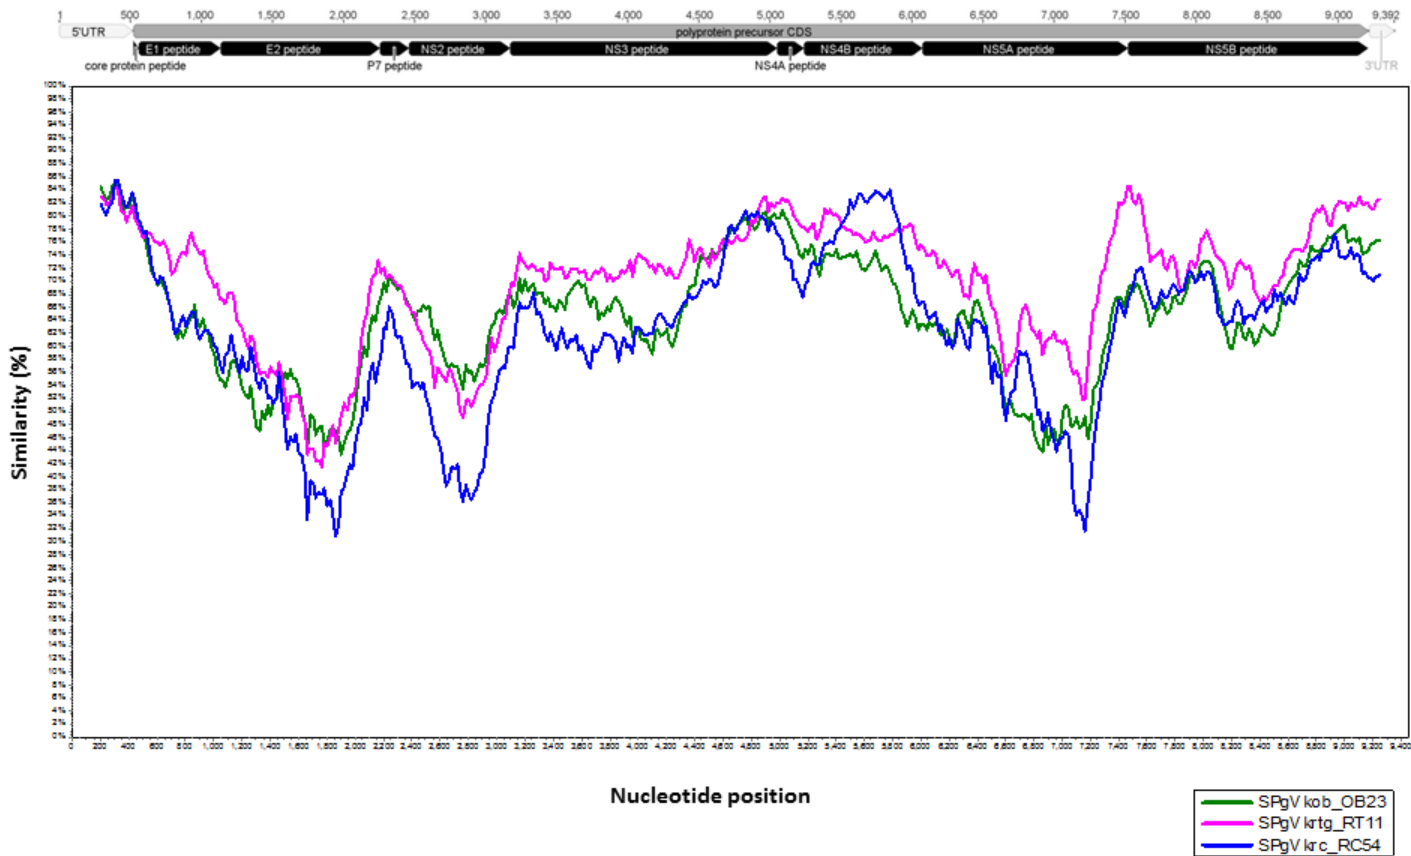

**Figure S2.** Sequence similarity plots based on entire genome of Gambian SPgVgm\_VGA00020 genome against 3 related genomes from Old World Monkeys in Uganda: isolate SPgVkob\_OB23 from olive baboon (*Papio anubis*), GenBank Accession No. KF234530; SPgVkrtg\_RT11 from red tailed guenon (*Cercopithecus ascanius*), GenBank Accession No. KF234529; SPgVkrc\_RC54 from red colobus monkey (*Piliocolobus tephrosceles*) GenBank Accession No. KF234520.

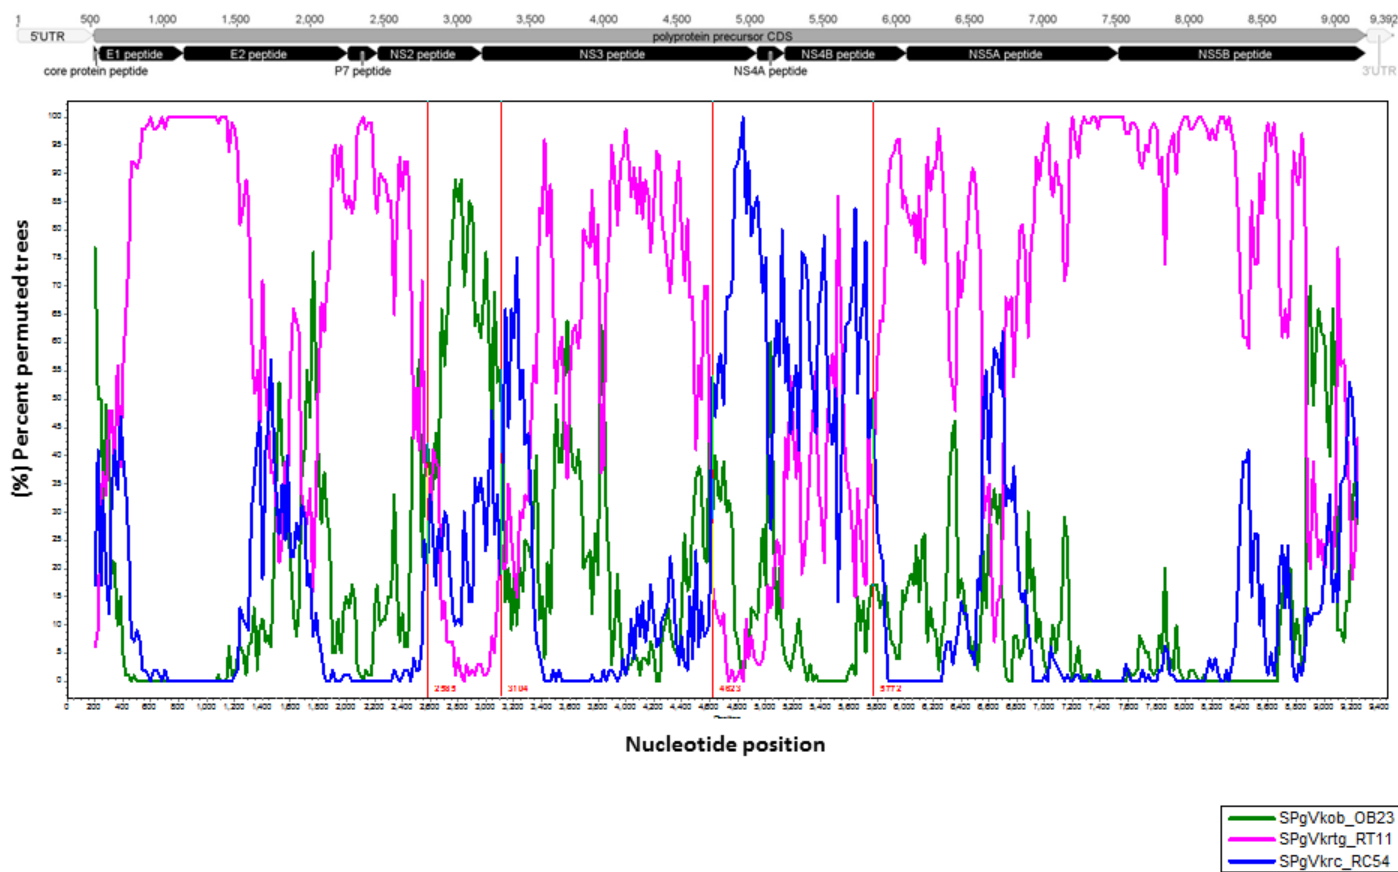

**Figure S3.** Bootscan analysis with SPgVagm\_VGA00020 as a query sequence. The analysis was done with a sliding window of 400 nt and a step size of 20 nt. The y-axis shows the percentage of the permuted tree in which the selected SPgV strains cluster with the query sequence. Recombination breakpoints were detected around genome positions 2585 and 3104. The potential recombination partner is SpgVkob\_OB23 isolate (olive baboon). The second breakpoint was detected around positions 4623 and 5772, with SPgVkrc\_RC54 (red colobus monkey) as recombination partner. All nucleotide positions are relative to SPgVkrc\_RC54 reference genome (GenBank Accession No. KF234520).

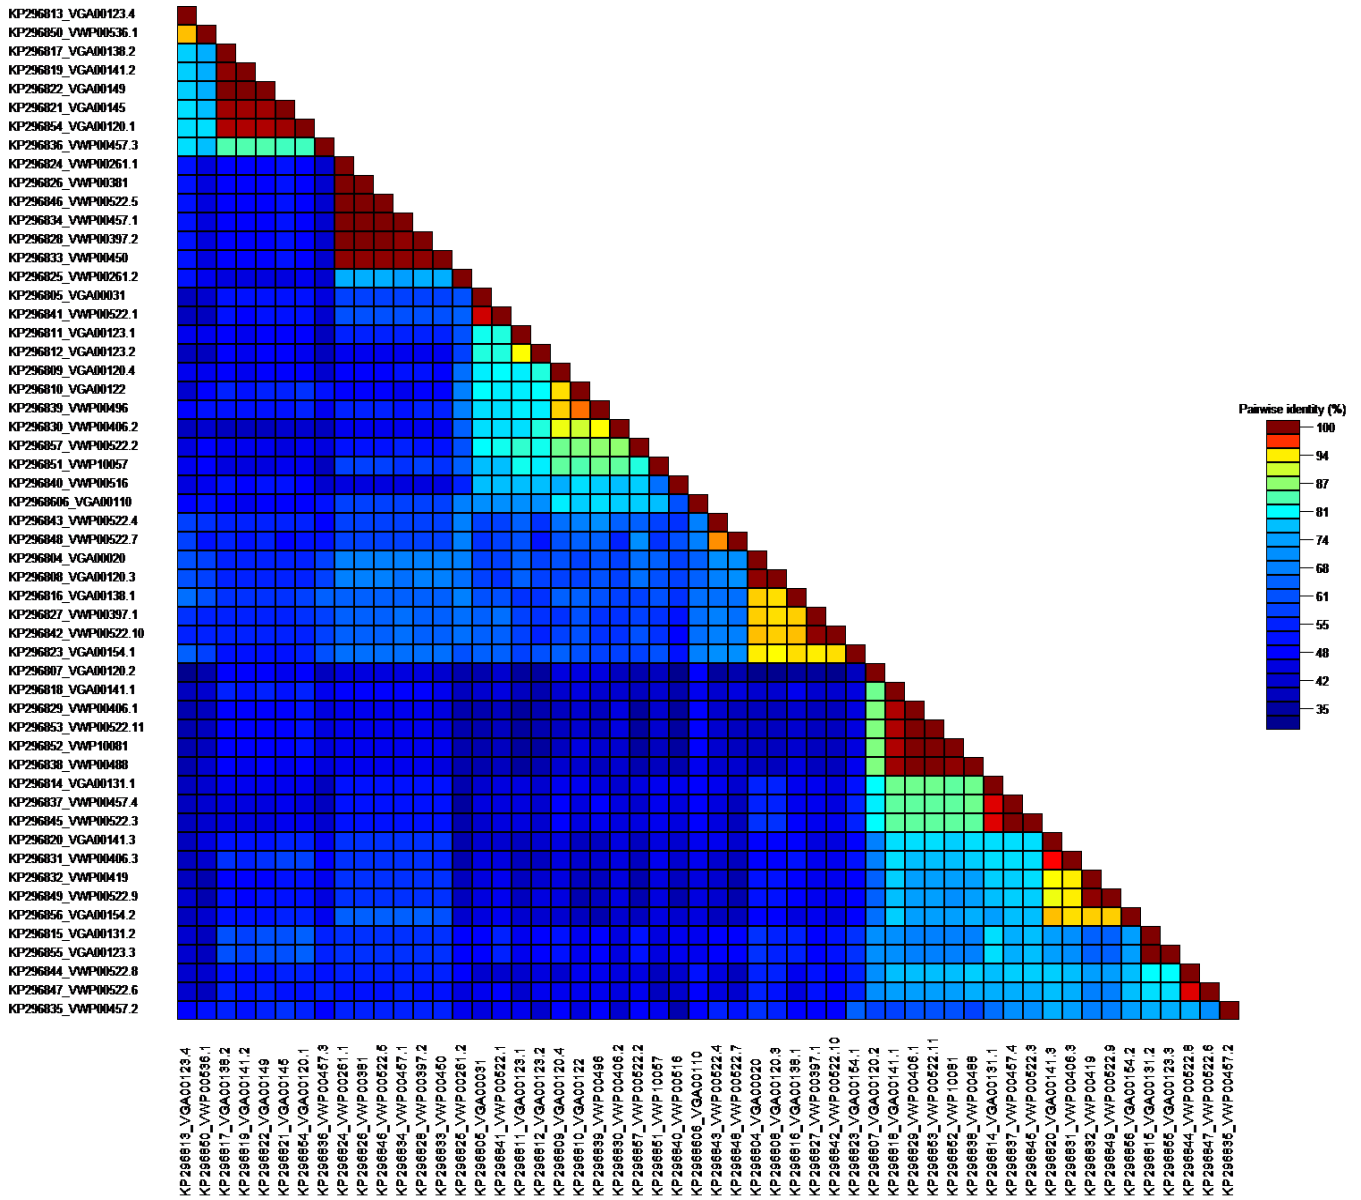

**Figure S4.** Color coded pairwise identity matrix generated from the partial ORF1 (positions 410-657aa, relative to GenBank reference: AB017610). Each colored cell represents a percentage identity score between two sequences.

|                      | KP296841_V... | KP296842_V... | KP296843_V... | KP296844_V... | KP296845_V... | KP296846_V... | KP296847_V... | KP296848_V... | KP296849_V... | KP296853_V... | KP296857_V... |
|----------------------|---------------|---------------|---------------|---------------|---------------|---------------|---------------|---------------|---------------|---------------|---------------|
| KP296841_VWP00522.1  |               | 44%           | 43%           | 37%           | 37%           | 44%           | 37%           | 42%           | 38%           | 34%           | 58%           |
| KP296842_VWP00522.10 | 44%           |               | 47%           | 39%           | 37%           | 46%           | 39%           | 47%           | 38%           | 34%           | 43%           |
| KP296843_VWP00522.4  | 43%           | 47%           |               | 37%           | 37%           | 44%           | 36%           | 82%           | 37%           | 36%           | 45%           |
| KP296844_VWP00522.8  | 37%           | 39%           | 37%           |               | 54%           | 41%           | 94%           | 35%           | 50%           | 53%           | 35%           |
| KP296845_VWP00522.3  | 37%           | 37%           | 37%           | 54%           |               | 41%           | 52%           | 35%           | 54%           | 63%           | 36%           |
| KP296846_VWP00522.5  | 44%           | 46%           | 44%           | 41%           | 41%           |               | 41%           | 44%           | 43%           | 38%           | 40%           |
| KP296847_VWP00522.6  | 37%           | 39%           | 36%           | 94%           | 52%           | 41%           |               | 36%           | 48%           | 51%           | 36%           |
| KP296848_VWP00522.7  | 42%           | 47%           | 82%           | 35%           | 35%           | 44%           | 36%           |               | 34%           | 35%           | 47%           |
| KP296849_VWP00522.9  | 38%           | 38%           | 37%           | 50%           | 54%           | 43%           | 48%           | 34%           |               | 50%           | 34%           |
| KP296853_VWP00522.11 | 34%           | 34%           | 36%           | 53%           | 63%           | 38%           | 51%           | 35%           | 50%           |               | 33%           |
| KP296857_VWP00522.2  | 58%           | 43%           | 45%           | 35%           | 36%           | 40%           | 36%           | 47%           | 34%           | 33%           |               |

**Figure S5.** Identity plot generated from multiple alignment of partial ORF1 sequence (247 aa). The 11 anellovirus sequences used , were derived from a single plasma sample (VWP00522).

|                      | KP296857_V... | KP296856_V... | KP296855_V... | KP296853_V... | KP296854_V... |
|----------------------|---------------|---------------|---------------|---------------|---------------|
| KP296857_VWP00522.2  |               | 45%           | 42%           | 45%           | 40%           |
| KP296856_VGA00120.1  | 45%           |               | 46%           | 48%           | 44%           |
| KP296855_VWP00522.11 | 42%           | 46%           |               | 58%           | 53%           |
| KP296853_VGA00123.3  | 45%           | 48%           | 58%           |               | 52%           |
| KP296854_VGA00154.2  | 40%           | 44%           | 53%           | 52%           |               |

**Figure S6.** Nucleotide identity plot of five full genome anelloviruses sequenced from African green monkeys. VGA is the code for Gambian samples; VWP is for Caribbean samples.



| Sample ID    | Total number of reads | Number of contigs or reads to blast virus RefSeq | Number of sequences hit virus | Number of virus hits passed NVNR filter |
|--------------|-----------------------|--------------------------------------------------|-------------------------------|-----------------------------------------|
| VGA00001     | 160518                | 51412                                            | 304                           | 72                                      |
| VGA00010     | 213054                | 60641                                            | 358                           | 184                                     |
| VGA00100     | 221970                | 53145                                            | 431                           | 422                                     |
| VGA00101     | 213118                | 63925                                            | 370                           | 50                                      |
| VGA00102     | 17354                 | 9241                                             | 78                            | 6                                       |
| VGA00107     | 192466                | 63382                                            | 341                           | 43                                      |
| VGA00108     | 511296                | 35208                                            | 2891                          | 1860                                    |
| VGA00109     | 859244                | 49514                                            | 1168                          | 636                                     |
| VGA00110     | 1039024               | 59740                                            | 2299                          | 1242                                    |
| VGA00119     | 53480                 | 5210                                             | 35                            | 14                                      |
| VGA00012     | 258532                | 72419                                            | 350                           | 137                                     |
| VGA00120     | 935148                | 87529                                            | 4045                          | 2255                                    |
| VGA00122     | 1064696               | 74594                                            | 1286                          | 488                                     |
| VGA00123     | 1361876               | 115018                                           | 4064                          | 2392                                    |
| VGA00128     | 392916                | 13563                                            | 9                             | 4                                       |
| VGA00129     | 751976                | 53464                                            | 768                           | 233                                     |
| VGA00130     | 1349668               | 103912                                           | 1165                          | 114                                     |
| VGA00132     | 1320880               | 106599                                           | 1117                          | 152                                     |
| VGA00135     | 531828                | 42758                                            | 561                           | 206                                     |
| VGA00138     | 920732                | 70820                                            | 2354                          | 1357                                    |
| VGA00141     | 881500                | 91721                                            | 4351                          | 2230                                    |
| VGA00145     | 335232                | 40372                                            | 817                           | 415                                     |
| VGA00147     | 522772                | 50516                                            | 573                           | 250                                     |
| VGA00149     | 456520                | 41939                                            | 1665                          | 1000                                    |
| VGA00154     | 274080                | 20941                                            | 829                           | 473                                     |
| VGA00155     | 305796                | 25868                                            | 454                           | 149                                     |
| VGA00017     | 197740                | 67714                                            | 338                           | 108                                     |
| VGA00019     | 277456                | 73949                                            | 897                           | 806                                     |
| VGA00002     | 189318                | 55071                                            | 290                           | 62                                      |
| VGA00020     | 147794                | 48029                                            | 1223                          | 1455                                    |
| VGA00131     | 1149460               | 82315                                            | 2411                          | 1227                                    |
| VGA00025     | 126898                | 36842                                            | 264                           | 239                                     |
| VGA00026     | 130662                | 47564                                            | 295                           | 46                                      |
| VGA00028     | 18782                 | 5855                                             | 22                            | 2                                       |
| VGA00003     | 113350                | 37125                                            | 435                           | 323                                     |
| VGA00031     | 139180                | 41885                                            | 667                           | 609                                     |
| VGA00004     | 181900                | 47607                                            | 251                           | 165                                     |
| VGA00040     | 184502                | 48692                                            | 246                           | 37                                      |
| VGA00041     | 93958                 | 23910                                            | 213                           | 202                                     |
| VGA00042     | 29796                 | 10069                                            | 47                            | 6                                       |
| VGA00096     | 268732                | 137047                                           | 510                           | 57                                      |
| VGA00098     | 205152                | 55738                                            | 549                           | 457                                     |
| VGA00099     | 93458                 | 26214                                            | 167                           | 149                                     |
| VWP10010     | 185208                | 51692                                            | 237                           | 27                                      |
| VWP10019     | 136202                | 36376                                            | 106                           | 17                                      |
| VWP00204     | 215886                | 63680                                            | 388                           | 134                                     |
| VWP00224     | 157218                | 37481                                            | 79                            | 23                                      |
| VWP00232     | 190960                | 52823                                            | 272                           | 75                                      |
| VWP10025     | 154234                | 39029                                            | 139                           | 37                                      |
| VWP00261     | 291958                | 66714                                            | 228                           | 87                                      |
| VWP00305     | 248362                | 72313                                            | 303                           | 76                                      |
| VWP10031     | 128742                | 26169                                            | 2                             | 1                                       |
| VWP00328     | 184852                | 45759                                            | 180                           | 55                                      |
| VWP00334     | 118146                | 32939                                            | 150                           | 39                                      |
| VWP00359     | 184162                | 46874                                            | 177                           | 31                                      |
| VWP10036     | 274372                | 84662                                            | 456                           | 156                                     |
| VWP00374     | 245290                | 69267                                            | 264                           | 85                                      |
| VWP00376     | 334976                | 82340                                            | 260                           | 67                                      |
| VWP00381     | 259268                | 71698                                            | 728                           | 574                                     |
| VWP00384     | 999800                | 58034                                            | 521                           | 158                                     |
| VWP00386     | 1141116               | 119960                                           | 3144                          | 295                                     |
| VWP00397     | 1222748               | 81797                                            | 2570                          | 940                                     |
| VWP00405     | 809876                | 46688                                            | 399                           | 124                                     |
| VWP00406     | 1768100               | 109277                                           | 3742                          | 1999                                    |
| VWP00407     | 1156044               | 86266                                            | 1774                          | 781                                     |
| VWP00419     | 1542292               | 105784                                           | 1310                          | 294                                     |
| VWP00431     | 1341232               | 46552                                            | 126                           | 64                                      |
| VWP00437     | 1412964               | 86749                                            | 581                           | 26                                      |
| VWP00449     | 1170640               | 85371                                            | 545                           | 32                                      |
| VWP10045     | 156932                | 49130                                            | 271                           | 135                                     |
| VWP00450     | 1081232               | 73402                                            | 889                           | 339                                     |
| VWP00457     | 1098988               | 66912                                            | 3169                          | 1970                                    |
| VWP00465     | 704740                | 54962                                            | 569                           | 61                                      |
| VWP00466     | 382952                | 31203                                            | 431                           | 139                                     |
| VWP00474     | 1082608               | 85863                                            | 1402                          | 511                                     |
| VWP10048     | 353810                | 72923                                            | 83                            | 18                                      |
| VWP00488     | 1037500               | 88049                                            | 1578                          | 570                                     |
| VWP00496     | 537732                | 46403                                            | 1364                          | 710                                     |
| VWP10050     | 290360                | 73405                                            | 213                           | 86                                      |
| VWP00516     | 292808                | 23684                                            | 1420                          | 894                                     |
| VWP00518     | 1232040               | 41038                                            | 136                           | 73                                      |
| VWP00522     | 1389000               | 120456                                           | 5285                          | 3134                                    |
| VWP00536     | 914084                | 127160                                           | 4625                          | 1825                                    |
| VWP10057     | 290814                | 71736                                            | 912                           | 734                                     |
| VWP10064     | 93212                 | 32861                                            | 231                           | 59                                      |
| VWP10081     | 188600                | 51552                                            | 534                           | 454                                     |
| VWP10009     | 273534                | 71416                                            | 256                           | 92                                      |
| <b>Total</b> | <b>45969408</b>       | <b>5197526</b>                                   | <b>83557</b>                  | <b>40335</b>                            |

**Table S2.** Number of sequencing reads and virus specific sequences and hits generated during deep sequencing on MiSeq Illumina platform.



|                      | All other Alpha | Infants,<br>Japan/China | Japanese<br>macaques | Gambia   |            |            |            |            |            |            |            |            |          |          |            | Caribbean  |            |            |          |          |             |             |            |            |            |            |            |            |  |
|----------------------|-----------------|-------------------------|----------------------|----------|------------|------------|------------|------------|------------|------------|------------|------------|----------|----------|------------|------------|------------|------------|----------|----------|-------------|-------------|------------|------------|------------|------------|------------|------------|--|
|                      |                 |                         |                      | VGA00110 | VGA00120.1 | VGA00120.2 | VGA00120.3 | VGA00123.3 | VGA00123.4 | VGA00138.2 | VGA00141.1 | VGA00141.2 | VGA00145 | VGA00149 | VGA00154.2 | VWP00406.1 | VWP00457.2 | VWP00457.4 | VWP00496 | VWP00516 | VWP00522.10 | VWP00522.11 | VWP00522.2 | VWP00522.3 | VWP00522.4 | VWP00522.7 | VWP00522.9 | VWP00536.1 |  |
| All other Alpha      |                 |                         |                      |          |            |            |            |            |            |            |            |            |          |          |            |            |            |            |          |          |             |             |            |            |            |            |            |            |  |
| Infants, Japan/China | 30%             | 51%                     |                      |          |            |            |            |            |            |            |            |            |          |          |            |            |            |            |          |          |             |             |            |            |            |            |            |            |  |
| Japanese macaques    | 26%             | 33%                     | 33%                  |          |            |            |            |            |            |            |            |            |          |          |            |            |            |            |          |          |             |             |            |            |            |            |            |            |  |
| Gambia               |                 |                         |                      |          |            |            |            |            |            |            |            |            |          |          |            |            |            |            |          |          |             |             |            |            |            |            |            |            |  |
| Caribbean            |                 |                         |                      |          |            |            |            |            |            |            |            |            |          |          |            |            |            |            |          |          |             |             |            |            |            |            |            |            |  |

**Table S3.** Percentage amino acid identity plotted across the alignments of complete ORF1 sequences (64-697 aa, relative to TTV1, isolate TA278) from Gambia (n=12) and the Caribbean (n=13) including other members of Alphatorquevirus genus. Different groups are represented by multiple species derived from the GenBank: All other Alpha (BAA25131 Torque teno virus 1, isolate TA278), Chinese and Japanese infants (YP\_003587845 Torque teno virus 27, BAA93583 Torque teno virus 29), and Japanese macaques (YP003587873 Torque teno virus 25, YP003587859 Torque teno virus 26).

|                      |             | All other Alpha | Infants, Japan/China | Japanese macaques | Gambia   |            |            |            |            |            |            |            |            |          | Caribbean |            |            |            |            |          |          |             |             |            |            |            |            |            |            |     |  |  |
|----------------------|-------------|-----------------|----------------------|-------------------|----------|------------|------------|------------|------------|------------|------------|------------|------------|----------|-----------|------------|------------|------------|------------|----------|----------|-------------|-------------|------------|------------|------------|------------|------------|------------|-----|--|--|
|                      |             |                 |                      |                   | VGA00110 | VGA00120.1 | VGA00120.2 | VGA00120.3 | VGA00123.3 | VGA00123.4 | VGA00138.2 | VGA00141.1 | VGA00141.2 | VGA00145 | VGA00149  | VGA00154.2 | VWP00406.1 | VWP00457.2 | VWP00457.4 | VWP00496 | VWP00516 | VWP00522.10 | VWP00522.11 | VWP00522.2 | VWP00522.3 | VWP00522.4 | VWP00522.7 | VWP00522.9 | VWP00536.1 |     |  |  |
| All other Alpha      |             | 55%             |                      |                   |          |            |            |            |            |            |            |            |            |          |           |            |            |            |            |          |          |             |             |            |            |            |            |            |            |     |  |  |
| Infants, Japan/China |             | 56%             | 43%                  |                   |          |            |            |            |            |            |            |            |            |          |           |            |            |            |            |          |          |             |             |            |            |            |            |            |            |     |  |  |
| Japanese macaques    |             | 60%             | 55%                  | 56%               |          |            |            |            |            |            |            |            |            |          |           |            |            |            |            |          |          |             |             |            |            |            |            |            |            |     |  |  |
|                      | VGA00110    | 61%             | 55%                  | 55%               | 56%      |            |            |            |            |            |            |            |            |          |           |            |            |            |            |          |          |             |             |            |            |            |            |            |            |     |  |  |
|                      | VGA00120.1  | 62%             | 56%                  | 56%               | 59%      | 56%        |            |            |            |            |            |            |            |          |           |            |            |            |            |          |          |             |             |            |            |            |            |            |            |     |  |  |
|                      | VGA00120.2  | 59%             | 56%                  | 53%               | 48%      | 55%        | 55%        |            |            |            |            |            |            |          |           |            |            |            |            |          |          |             |             |            |            |            |            |            |            |     |  |  |
|                      | VGA00120.3  | 61%             | 58%                  | 57%               | 59%      | 57%        | 48%        | 55%        |            |            |            |            |            |          |           |            |            |            |            |          |          |             |             |            |            |            |            |            |            |     |  |  |
|                      | VGA00123.3  | 62%             | 54%                  | 56%               | 57%      | 51%        | 45%        | 53%        | 48%        |            |            |            |            |          |           |            |            |            |            |          |          |             |             |            |            |            |            |            |            |     |  |  |
|                      | VGA00123.4  | 61%             | 58%                  | 56%               | 57%      | 58%        | 57%        | 54%        | 49%        | 55%        |            |            |            |          |           |            |            |            |            |          |          |             |             |            |            |            |            |            |            |     |  |  |
|                      | VGA00138.2  | 61%             | 55%                  | 55%               | 49%      | 55%        | 45%        | 49%        | 48%        | 43%        | 57%        |            |            |          |           |            |            |            |            |          |          |             |             |            |            |            |            |            |            |     |  |  |
|                      | VGA00141.1  | 60%             | 55%                  | 55%               | 52%      | 54%        | 46%        | 25%        | 46%        | 43%        | 55%        | 38%        |            |          |           |            |            |            |            |          |          |             |             |            |            |            |            |            |            |     |  |  |
|                      | VGA00141.2  | 62%             | 60%                  | 58%               | 62%      | 59%        | 49%        | 56%        | 29%        | 48%        | 50%        | 48%        | 46%        |          |           |            |            |            |            |          |          |             |             |            |            |            |            |            |            |     |  |  |
|                      | VGA00145    | 60%             | 55%                  | 55%               | 52%      | 55%        | 46%        | 25%        | 46%        | 43%        | 55%        | 38%        | 1%         | 47%      |           |            |            |            |            |          |          |             |             |            |            |            |            |            |            |     |  |  |
|                      | VGA00149    | 60%             | 56%                  | 55%               | 52%      | 55%        | 46%        | 25%        | 46%        | 43%        | 54%        | 38%        | 3%         | 46%      | 4%        |            |            |            |            |          |          |             |             |            |            |            |            |            |            |     |  |  |
|                      | VGA00154.2  | 60%             | 56%                  | 55%               | 52%      | 55%        | 46%        | 25%        | 46%        | 43%        | 54%        | 38%        | 2%         | 46%      | 2%        |            |            |            |            |          |          |             |             |            |            |            |            |            |            |     |  |  |
| Gambia               | VGA00154.2  | 60%             | 56%                  | 58%               | 58%      | 59%        | 58%        | 57%        | 49%        | 57%        | 51%        | 57%        | 57%        | 49%      | 57%       | 57%        |            |            |            |          |          |             |             |            |            |            |            |            |            |     |  |  |
|                      | VWP00406.1  | 61%             | 60%                  | 59%               | 62%      | 60%        | 48%        | 57%        | 29%        | 48%        | 50%        | 49%        | 47%        | 6%       | 47%       | 47%        | 47%        | 47%        | 49%        |          |          |             |             |            |            |            |            |            |            |     |  |  |
|                      | VWP00457.2  | 61%             | 57%                  | 58%               | 60%      | 59%        | 49%        | 55%        | 40%        | 47%        | 50%        | 47%        | 45%        | 41%      | 45%       | 44%        | 44%        | 52%        | 40%        |          |          |             |             |            |            |            |            |            |            |     |  |  |
|                      | VWP00457.4  | 59%             | 57%                  | 56%               | 61%      | 57%        | 48%        | 56%        | 34%        | 45%        | 50%        | 47%        | 47%        | 33%      | 46%       | 46%        | 47%        | 48%        | 32%        | 37%      |          |             |             |            |            |            |            |            |            |     |  |  |
|                      | VWP00496    | 62%             | 56%                  | 56%               | 59%      | 57%        | 39%        | 55%        | 48%        | 44%        | 57%        | 46%        | 46%        | 48%      | 46%       | 46%        | 46%        | 57%        | 49%        | 47%      | 46%      |             |             |            |            |            |            |            |            |     |  |  |
|                      | VWP00516    | 61%             | 57%                  | 56%               | 59%      | 57%        | 41%        | 54%        | 50%        | 45%        | 57%        | 45%        | 45%        | 49%      | 45%       | 46%        | 46%        | 58%        | 49%        | 50%      | 47%      | 39%         |             |            |            |            |            |            |            |     |  |  |
|                      | VWP00522.10 | 61%             | 54%                  | 55%               | 56%      | 52%        | 44%        | 54%        | 47%        | 24%        | 55%        | 42%        | 43%        | 47%      | 44%       | 43%        | 44%        | 56%        | 48%        | 47%      | 46%      | 46%         | 45%         |            |            |            |            |            |            |     |  |  |
|                      | VWP00522.11 | 61%             | 58%                  | 60%               | 60%      | 59%        | 55%        | 55%        | 40%        | 55%        | 50%        | 55%        | 54%        | 24%      | 54%       | 55%        | 54%        | 49%        | 23%        | 49%      | 44%      | 55%         | 55%         | 56%        |            |            |            |            |            |     |  |  |
|                      | VWP00522.2  | 59%             | 54%                  | 56%               | 57%      | 57%        | 52%        | 55%        | 60%        | 56%        | 57%        | 56%        | 56%        | 59%      | 56%       | 56%        | 58%        | 60%        | 60%        | 59%      | 58%      | 46%         | 51%         | 55%        | 58%        |            |            |            |            |     |  |  |
|                      | VWP00522.3  | 59%             | 57%                  | 56%               | 60%      | 57%        | 48%        | 56%        | 34%        | 45%        | 49%        | 47%        | 47%        | 33%      | 46%       | 46%        | 47%        | 48%        | 32%        | 37%      | 1%       | 46%         | 46%         | 46%        | 43%        | 58%        |            |            |            |     |  |  |
|                      | VWP00522.4  | 61%             | 56%                  | 56%               | 57%      | 55%        | 39%        | 55%        | 47%        | 41%        | 56%        | 43%        | 44%        | 49%      | 45%       | 45%        | 45%        | 58%        | 48%        | 47%      | 46%      | 38%         | 40%         | 43%        | 56%        | 53%        | 46%        |            |            |     |  |  |
|                      | VWP00522.7  | 62%             | 56%                  | 55%               | 57%      | 55%        | 37%        | 54%        | 47%        | 43%        | 56%        | 44%        | 44%        | 49%      | 44%       | 45%        | 45%        | 58%        | 48%        | 48%      | 46%      | 39%         | 41%         | 44%        | 55%        | 53%        | 46%        | 16%        |            |     |  |  |
|                      | VWP00522.9  | 61%             | 58%                  | 59%               | 61%      | 58%        | 49%        | 58%        | 41%        | 47%        | 51%        | 49%        | 49%        | 38%      | 49%       | 49%        | 49%        | 40%        | 38%        | 41%      | 38%      | 47%         | 48%         | 46%        | 48%        | 60%        | 38%        | 48%        | 49%        |     |  |  |
| Caribbean            | VWP00536.1  | 62%             | 56%                  | 55%               | 50%      | 55%        | 45%        | 49%        | 48%        | 44%        | 57%        | 19%        | 37%        | 47%      | 37%       | 37%        | 37%        | 57%        | 48%        | 46%      | 47%      | 46%         | 45%         | 42%        | 54%        | 57%        | 47%        | 45%        | 43%        | 49% |  |  |

**Table S4.** Color coded nucleotide distance matrix generated from complete ORF1 (positions 713-2775 nt), relative to GenBank reference: AB017610 (TTV1, isolate TA278). Divergence of >56% defines new genera, >35% is a demarcation for a new species.
